# Supplementary material
Source: publisher site journal article supplement (https://www.spandidos-publications.com/4294/downloadSupplementary)
Supplement: Supplementary file 1 [file downloadSupplementary]

## Sheet: Supplementary File 5
Table SVIII. The top 6 GO terms enriched in the downregulated genes in the siDEK-treated cells
Term	Database	ID	Input number	Background number	P-value	Corrected P-value	Input	Hyperlink
Nucleosome assembly	Gene Ontology	GO:0006334	12	117	0	0	HIST1H1E|HIST1H2AD|HIST2H2BF|HIST1H2AJ|HIST1H1D|HIST1H2BM|HIST1H2AG|HIST1H2BO|HIST2H2AB|HIST1H2BN|HIST1H1B|HIST1H2AH	http://amigo.geneontology.org/amigo/term/GO:0006334
Cellular nitrogen compound metabolic process	Gene Ontology	GO:0034641	6	185	9.91e-07	2.97e-06	KYNU|PSPH|ASNS|OAZ3|PSAT1|CTH	http://amigo.geneontology.org/amigo/term/GO:0034641
Chromatin organization	Gene Ontology	GO:0006325	5	112	1.84e-06	3.68e-06	HIST1H2BM|HIST1H2BN|HIST1H2BO|HIST2H2BF|HIST1H1B	http://amigo.geneontology.org/amigo/term/GO:0006325
Small molecule metabolic process	Gene Ontology	GO:0044281	9	1413	0.000765617	0.00114843	PSAT1|KYNU|PSPH|ASNS|OAZ3|PRSS1|APOA4|CTH|HSD11B1	http://amigo.geneontology.org/amigo/term/GO:0044281
Transcription, DNA-dependent	Gene Ontology	GO:0006351	7	1857	0.0506958	0.060835	ZNF81|NUPR1|JDP2|HOXB7|ZNF846|CREB3L3|ZNF519	http://amigo.geneontology.org/amigo/term/GO:0006351
Regulation of transcription, DNA-dependent	Gene Ontology	GO:0006355	5	1305	0.0917341	0.0917341	ZNF81|ZNF519|ZNF846|NUPR1|HOXB7	http://amigo.geneontology.org/amigo/term/GO:0006355
